# Supplementary material for: Efficient Sr-90 removal from highly alkaline solution by an ultrastable crystalline zirconium phosphonate
Source: Royal Society of Chemistry journal article supplement (doi:10.1039/d1cc02446a), 2021-01-01
Supplement: d1cc02446a1.pdf [file d1cc02446a1.pdf]

## Supplementary Information

### Efficient Sr-90 removal from highly alkaline solution by a ultrastable crystalline zirconium phosphonate

Jiarong Zhang,<sup>‡a,b</sup> Long Chen,<sup>‡c</sup> Xing Dai,<sup>c</sup> Lixi Chen,<sup>c</sup> Fuwan Zhai,<sup>c</sup> Weifeng Yu,<sup>d</sup> Shikai Guo,<sup>d</sup> Lijiang Yang,<sup>d</sup> Lanhua Chen,<sup>c</sup> Yugang Zhang,<sup>c</sup> Linwei He,<sup>c</sup> Changlun Chen<sup>\*a,b</sup>, Zhifang Chai<sup>c</sup> and Shuao Wang<sup>\*c</sup>

<sup>a</sup>*Institute of Plasma Physics, HFIPS, Chinese Academy of Sciences, P.O. Box 1126, Hefei 230031, P. R. China. E-mail: clchen@ipp.ac.cn.*

<sup>b</sup>*University of Science and Technology of China, Hefei 230026, P. R. China.*

<sup>c</sup>*State Key Laboratory of Radiation Medicine and Protection, School for Radiological and Interdisciplinary Sciences (RAD-X) and Collaborative Innovation Center of Radiation Medicine of Jiangsu Higher Education Institutions, Soochow University, Suzhou 215123, China. E-mail: shuaowang@suda.edu.cn.*

<sup>d</sup>*The 404 Company Limited China National Nuclear Corporation, Jiayuguan 735100, China.*

<sup>‡</sup> *These authors contributed equally to this work.*

<sup>\*</sup> *shuaowang@suda.edu.cn; [clchen@ipp.ac.cn](mailto:clchen@ipp.ac.cn).*

### Table of Contents

#### Methods and Experiments

**Table S1. Crystallographic data for complexes.**

**Table S2. Bond distances of SZ-7.**

**Table S3. Bond Valence Sum (BVS) calculations O atoms.**

**Table S4. The equilibrium time and adsorption capacity for different materials in Sr<sup>2+</sup> adsorption.**

**Table S5. Chemical composition of the simulated SRS tank waste sample used for test.**

**Table S6. <sup>90</sup>Sr sorption results of SZ-7 by liquid scintillation counting in simulated SRS waste.**

**Figure S1. Powder X-ray diffraction patterns of SZ-7.**

**Figure S2. The asymmetric unit of SZ-7.**

**Figure S3. The thermogravimetric analysis data of SZ-7.**

**Figure S4. Powder X-ray diffraction patterns of SZ-7 after treatment with aqueous solutions with different pH values.**

**Figure S5. Powder X-ray diffraction patterns of SZ-7 samples after  $\beta$  radiation.**

**Figure S6. Powder X-ray diffraction patterns of SZ-7 samples after  $\gamma$  radiation.**

**Figure S7. Pseudo-second-order model for  $\text{Sr}^{2+}$  uptake by SZ-7.**

**Figure S8. Comparison of the  $\text{Sr}^{2+}$  removal capacity (q) by SZ-7 with other Sr-adsorbents at different pH values.**

**Figure S9. Thermodynamic calculations on the equilibrium speciation of  $\text{Sr}^{2+}$  at alkaline condition.**

**Figure S10. Ion-exchange column made with SZ-7 composite used in the column experiment.**

**Figure S11. EDS data and SEM images of SZ-7.**

**Figure S12. EDS data and SEM images of Sr-loaded SZ-7.**

**Figure S13. Powder X-ray diffraction patterns of experimental Sr-loaded SZ-7 samples.**

## Methods and Experiments

*Materials:* All chemical reagents and solvents were received from commercial suppliers. **Caution!** Sr-90 is a high-energy  $\beta$  emitter. All Sr-90 experiments were performed in an authorized laboratory designed for radiological studies and provided standard protections for radioactive materials.

*X-ray Crystallography Studies:* Single crystal X-ray diffraction data of SZ-7 was collected on a Bruker D8-Venture diffractometer with a Turbo X-ray Source (Mo-K $\alpha$  radiation,  $\lambda = 0.71073 \text{ \AA}$ ) and a CMOS detector under 298 K. The data of SZ-7 was collected using the program APEX3 and then processed using SAINT routine in APEX3. SHELXTL was used to solve and refine the structure of SZ-7 by direct methods.

*Characterizations:* Powder X-ray diffraction (PXRD) patterns were collected from  $5^\circ$  to  $50^\circ$  with a step of  $0.02^\circ$  on a Bruker D8 Advance diffractometer with Cu K $\alpha$  radiation ( $\lambda=1.54056 \text{ \AA}$ ) and a Lynxeye one-dimensional detector. Thermogravimetric analyses were performed on a NETZSCH STA449F3 instrument in the range of 30-900  $^\circ\text{C}$  with a heating rate of 10 K/min under a nitrogen flow for the dried SZ-7. Scanning electron microscopy images and energy-dispersive spectroscopy data (SEM/EDS) of SZ-7 were collected on a FEI Quanta 200FEG Scanning Electron Microscope with the energy of the electron beam being 30 keV. SZ-7 samples were directly placed on the carbon conductive tape, and then

coated with Au. The concentration of nonradioactive  $\text{Sr}^{2+}$  was determined by inductively coupled plasma-atomic emission spectrometry (ICP-AES, Thermo Fisher Scientific iCAP 7000) or inductively coupled plasma-mass spectrometry (ICP-MS, Thermo Finnigan high resolution magnetic sector Element 2) depending on the specific concentration. Meanwhile, the concentration of radioactive  $^{90}\text{Sr}^{2+}$  in solution was measured using liquid scintillation counting system (LCS). X-ray photoelectron spectroscopy (XPS) spectra were collected with a KratosAxis UltraDLD spectrometer using a monochromatic Al  $K\alpha$  source (1486.6 eV) and the samples for XPS analysis were prepared in the batch experiments.

*Synthesis of SZ-7:* SZ-7 was synthesized by a solvothermal reaction. The mixture of 0.15 mmol (48.3 mg) of  $\text{ZrOCl}_2 \cdot 8\text{H}_2\text{O}$  and 0.25 mmol (94.5 mg) of p-Xylenebis(diethyl phosphonate) dissolving in 2 mL of N,N-dimethylacetamide (DMA), 0.5 mL of  $\text{H}_2\text{O}$ , 0.15 mL  $\text{HNO}_3$  solution (68%) and 0.05 mL HF solution (40wt%) was placed in a Teflon-lined stainless steel reactor and heated at 210 °C for 3 d, and then cooled to 30 °C at a rate of 22.5 °C  $\text{h}^{-1}$ . The precipitated solid was separated and washed with ethanol, and then dried at 60°C. Finally, colourless crystals were obtained as a pure phase.

*Stability Measurements:* Hydrolytic stability of SZ-7 was studied by stirring the samples in  $\text{HNO}_3$  or NaOH solutions with different pH from 0 to 14 for 12 h. The solids were re-collected and treated for PXRD patterns

analysis.  $\beta$  irradiation resistance experiment was implemented using electron beams (1.2 MeV) provided by an electron accelerator. SZ-7 was irradiated for two different doses of 100 and 200 kGy at a dose rate of 20 kGy/h.  $\gamma$  irradiation experiment was carried out using a  $^{60}\text{Co}$  irradiation source ( $2.22 \times 10^{15}$  Bq) in the similar dose. PXRD patterns of irradiated SZ-7 samples were then collected to evaluate the irradiation stability.

*Sr<sup>2+</sup> Sorption Experiments:* All the experiments were carried out at room temperature using the batch method. The solid/liquid ratio in nonradioactive batch experiments was 1 g/L. In a typical ion-exchange experiment of SZ-7, 10 mg SZ-7 was added into 10 mL aqueous solution containing certain  $\text{Sr}^{2+}$ . The mixture was kept stirring for 12 h. The concentration of  $\text{Sr}^{2+}$  in solution was determined by inductively coupled plasma mass spectrometry (ICP-MS) and/or inductively coupled plasma-atomic emission spectrometry (ICP-AES). The solids were separated by centrifugation or filtration. The distribution coefficient  $K_d$  is given by the equation:

$$K_d = (V[(C_0 - C_e)/C_e])/m$$

where V is the volume (mL) of the testing solution,  $C_0$  and  $C_e$  are the initial and equilibrium concentration of  $\text{Sr}^{2+}$  ( $\text{mg L}^{-1}$ ), and m is the amount of the SZ-7 samples (g) used in the experiment.

*Kinetics Experiments:* In the kinetics study, 30 mg of SZ-7 material was added into a 30 mL solution containing 10 ppm  $\text{Sr}^{2+}$ . The mixture was

then stirred by a magnetic bar for a desired contact time and then the concentration of  $\text{Sr}^{2+}$  as a function of time was obtained to determine the exchange kinetics line.

Adsorption Isotherm: The  $\text{Sr}^{2+}$  removal from solutions of various concentrations of 0-400 mg/L were investigated at the solid/liquid of 1 g/L stirring for 12 h at room temperature. The data were used for the determination of  $\text{Sr}^{2+}$  adsorption isotherm curve.

Competitive experiment: Competitive ion-exchange experiments of SZ-7 were also performed with the batch method at the solid/liquid of 1 g/L with the contact time of 12 h at room temperature. Specifically, 10 mg SZ-7 samples were stirred with 10 mL solutions containing 5 mg/L  $\text{Sr}^{2+}$  with the  $\text{Na}^+/\text{K}^+ : \text{Sr}^{2+}$  molar ratio of 10:1, 100:1, 1000:1, 5000:1, and 10000:1 and 20000:1, respectively.

Column experiment: Column experiment was performed at auto solid phase extraction system (Sepaths UP4) with 70 mg SZ-7 samples packed into 3 mL column. The removal ratio was evaluated using aqueous solutions of 5 mg/L  $\text{Sr}^{2+}$  at a flow rate of 1 mL/min.

HLW adsorption experiment: The **radioactive**  $^{90}\text{Sr}$  removal performance from simulated SRS tank waste with a total  $\beta$  activity of 455 cpm were further studied by adding SZ-7 samples to 3 mL  $^{90}\text{Sr}$  solutions with different solid-liquid ratios of 1:1, 5:1, 10:1, and 15:1. The mixtures

were placed on a shaker for 12 h, followed by analysis using the LSC technique.

**Table S1.** Crystallographic data for complexes.

| Sample                                                                                      | SZ-7                                                                                         |
|---------------------------------------------------------------------------------------------|----------------------------------------------------------------------------------------------|
| CCDC No.                                                                                    | 2082185                                                                                      |
| Formula                                                                                     | $[(\text{CH}_3)_2\text{NH}_2]_2[\text{ZrC}_6\text{H}_4(\text{CH}_2\text{PO}_3)_2\text{F}_2]$ |
| $M_r[\text{g mol}^{-1}]$                                                                    | 461.32                                                                                       |
| Crystal system                                                                              | triclinic                                                                                    |
| Space group                                                                                 | $P \bar{1}$                                                                                  |
| $a$ (Å)                                                                                     | 5.3254(10)                                                                                   |
| $b$ (Å)                                                                                     | 8.7035(16)                                                                                   |
| $c$ (Å)                                                                                     | 11.343(2)                                                                                    |
| $\alpha$                                                                                    | 92.747(10)                                                                                   |
| $\beta$                                                                                     | 102.575(10)                                                                                  |
| $\gamma$                                                                                    | 107.729(10)                                                                                  |
| $V$ (Å <sup>3</sup> )                                                                       | 485.05(16)                                                                                   |
| $Z$                                                                                         | 1                                                                                            |
| $D_c$ (g cm <sup>-3</sup> )                                                                 | 1.579                                                                                        |
| $F(000)$                                                                                    | 224                                                                                          |
| T(K)                                                                                        | 296(2)                                                                                       |
| $R_1,^a (I > 2\sigma(I))$                                                                   | 0.0995, 0.2750                                                                               |
| $R_1,^a (\text{all data})$                                                                  | 0.1314, 0.2953                                                                               |
| $^a R_1 = \sum(F_o - F_c)/\sum F_o; wR_2 = [\sum w(F_o^2 - F_c^2)^2/\sum w(F_o^2)^2]^{1/2}$ |                                                                                              |

**Table S2.** Bond distances of SZ-7

| Sample | Bond type | Distance(Å) | Bond type                  | Distance(Å) |
|--------|-----------|-------------|----------------------------|-------------|
| SZ-7   | Zr1-F1    | 1.987(6)    | N1···O1<br>(Hydrogen bond) | 2.928       |
|        | Zr1-O1    | 2.056(8)    |                            |             |
|        | Zr1-O2    | 2.075(8)    |                            |             |

**Table S3.** Bond Valence Sum (BVS) calculations O atoms.<sup>1</sup>

| Atom | BVS value | Bond type |
|------|-----------|-----------|
| O1   | 1.91      | Zr-O-P    |
| O2   | 2.04      | Zr-O-P    |
| O3   | 1.32      | P=O       |

**Table S4.** The equilibrium time and adsorption capacity for different materials in Sr<sup>2+</sup> adsorption.

| Compound                                  | Experimental conditions               | Equilibrium time         | q (mg/g)   | Ref              |
|-------------------------------------------|---------------------------------------|--------------------------|------------|------------------|
| FJISM-SnS                                 | T=290 K; 1 g/L;<br>pH~7               | 60 min                   | 65.19      | 2                |
| KMS-1                                     | 1 g/L                                 | >2 h                     | 77         | 3                |
| KMS-2                                     | T=298 K; 1 g/L;<br>pH=6.9             | 10-15 h                  | 86.89      | 4                |
| KTS-3                                     | T=298 K; 1 g/L<br>Neutral pH          | >5 min                   | 102        | 5                |
| ETS-4                                     | T=298 K; 4 g/L<br>pH=5.9              | 24 h                     | 201.5      | 6                |
| MST                                       | T=293 K; 10 g/L<br>pH=5               | >24 h                    | 121.3      | 7                |
| Zeolite A                                 | T=298 K; 1 g/L<br>pH=6                | 90-120 min<br>(20-60 °C) | 69.78      | 8                |
| Go-Hap                                    | T=298 K; 0.5 g/L<br>pH=7.0±0.1;       | 2 h                      | 702.18     | 9                |
| SZ-4                                      | T=298 K; 1 g/L;<br>pH=4               | 20 min                   | 129.8      | 10               |
| FJSM-InMOF                                | T=298 K; 1 g/L                        | 2040 min                 | 43.83      | 11               |
| Nd-BTC                                    | T=298 K; 0.05 g<br>pH=8               | 30 min                   | 58         | 12               |
| MOF-808-<br>C <sub>2</sub> O <sub>4</sub> | T=293 K; 1 g/L;<br>pH=4               | 120                      | 206.34     | 13               |
| <b>SZ-7</b>                               | <b>T=298 K; 1 g/L;<br/>Neutral pH</b> | <b>5 min</b>             | <b>129</b> | <b>This work</b> |

**Table S5.** Chemical composition of the simulated SRS tank waste sample used for test.<sup>14</sup>

| Compound                                                         | Concentration (mol/L)* |
|------------------------------------------------------------------|------------------------|
| Sr(NO <sub>3</sub> ) <sub>2</sub>                                | $1.8 \times 10^{-4}$   |
| KNO <sub>3</sub>                                                 | $7.42 \times 10^{-3}$  |
| NaOH                                                             | 1                      |
| NaNO <sub>3</sub>                                                | 3.73                   |
| NaNO <sub>2</sub>                                                | 0.49                   |
| NaCl                                                             | $1.33 \times 10^{-2}$  |
| Na <sub>2</sub> SO <sub>4</sub>                                  | $4 \times 10^{-2}$     |
| Na <sub>2</sub> HPO <sub>4</sub>                                 | $6.87 \times 10^{-2}$  |
| Radioactive Compound                                             | Activity (CPM)         |
| <sup>90</sup> Sr <sup>2+</sup>                                   | 455                    |
| *The components with concentrations below 0.001 M were excluded. |                        |

**Table S6** <sup>90</sup>Sr sorption results of SZ-7 by liquid scintillation counting in simulated SRS waste.

| Phase ratio(mg/mL) | <sup>90</sup> Sr activity |
|--------------------|---------------------------|
| 1                  | 25                        |
| 5                  | 34                        |
| 10                 | 23                        |
| 15                 | 22                        |

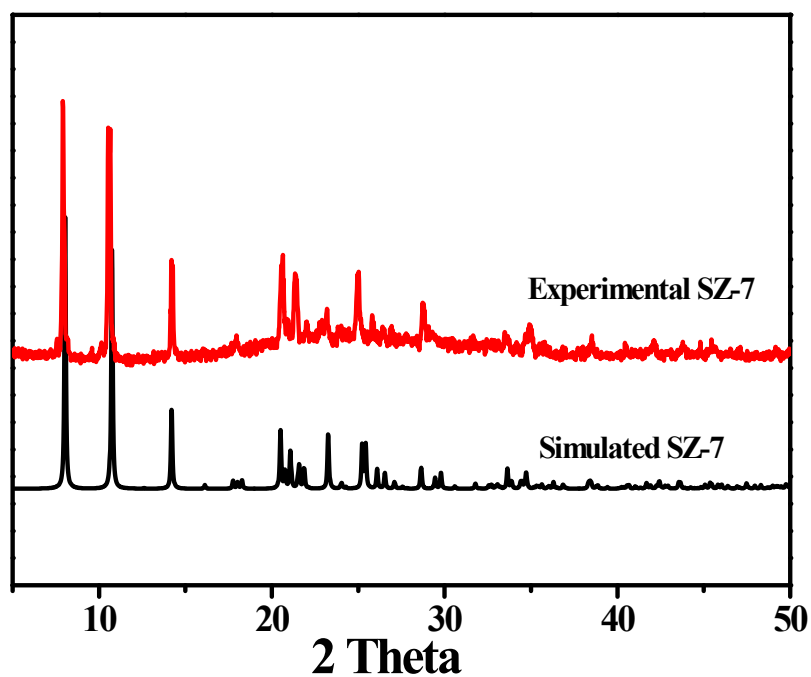

**Figure S1.** Powder X-ray diffraction patterns of SZ-7.

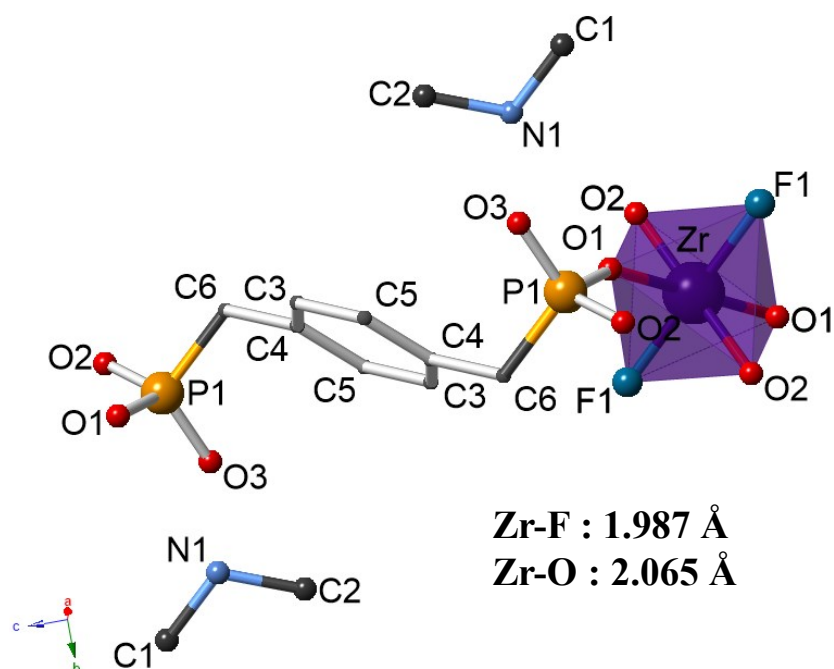

**Figure S2.** The asymmetric unit of SZ-7.

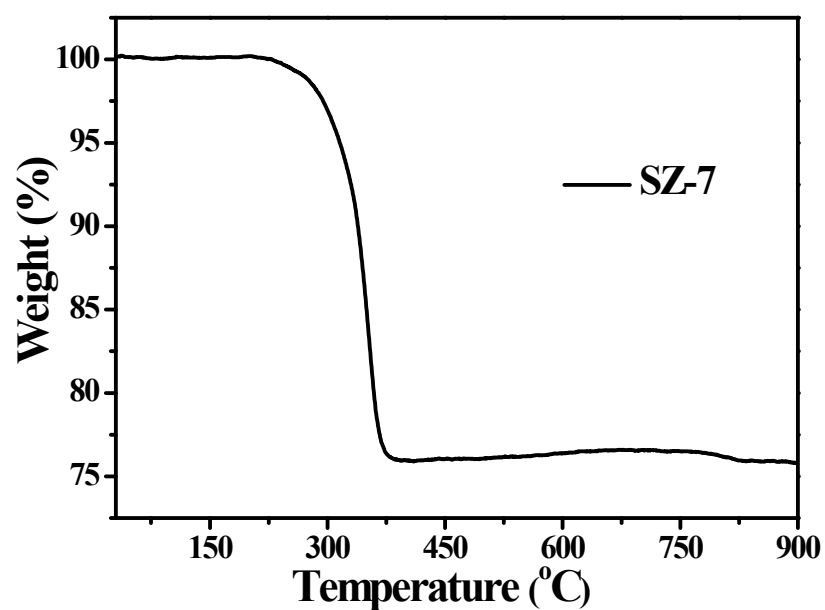

**Figure S3.** The thermogravimetric analysis data of SZ-7.

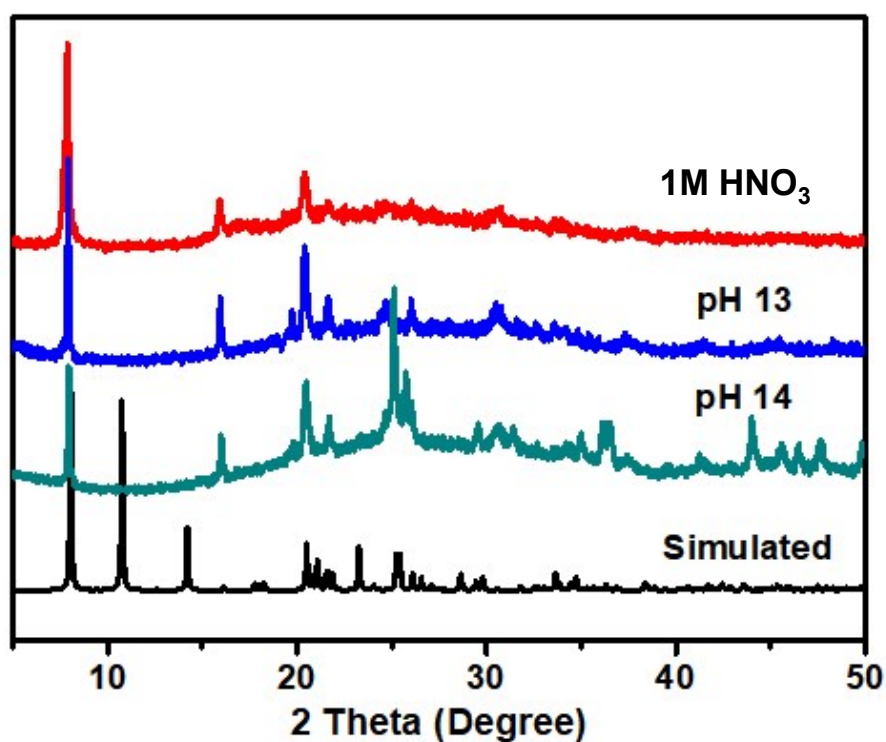

**Figure S4.** Powder X-ray diffraction patterns of SZ-7 after treatment with aqueous solutions with different pH values.

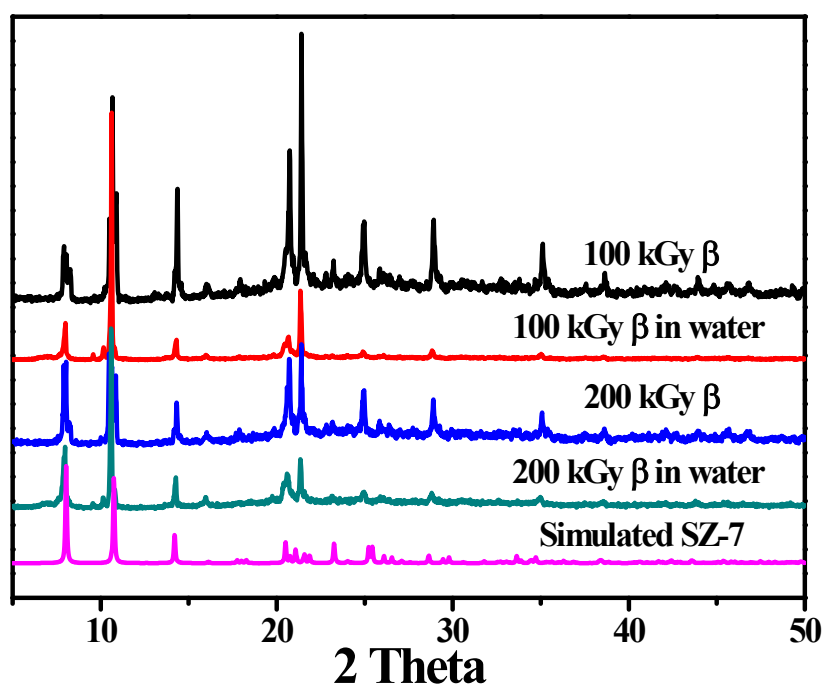

**Figure S5.** Powder X-ray diffraction patterns of SZ-7 samples after  $\beta$  radiation.

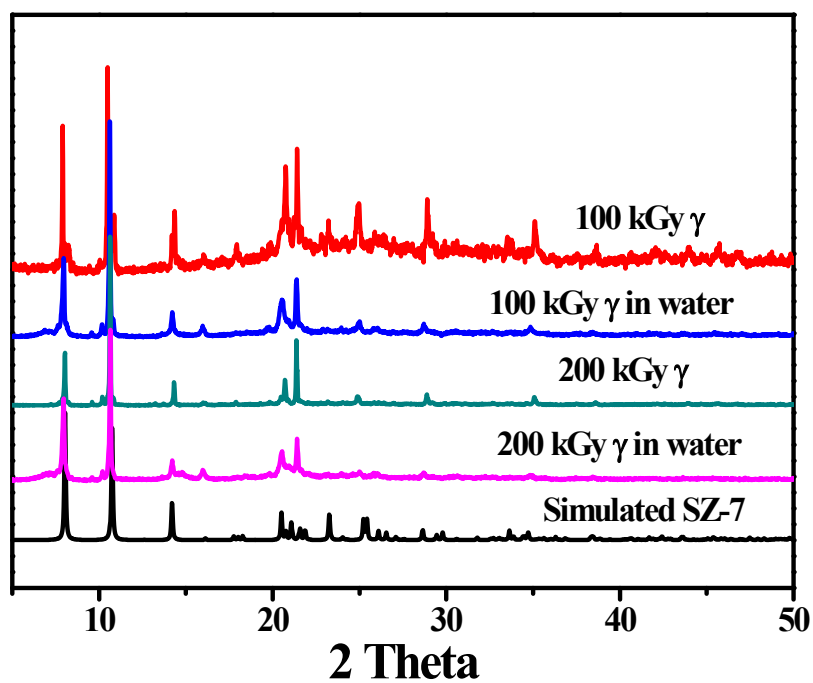

**Figure S6.** Powder X-ray diffraction patterns of SZ-7 samples after  $\gamma$  radiation.

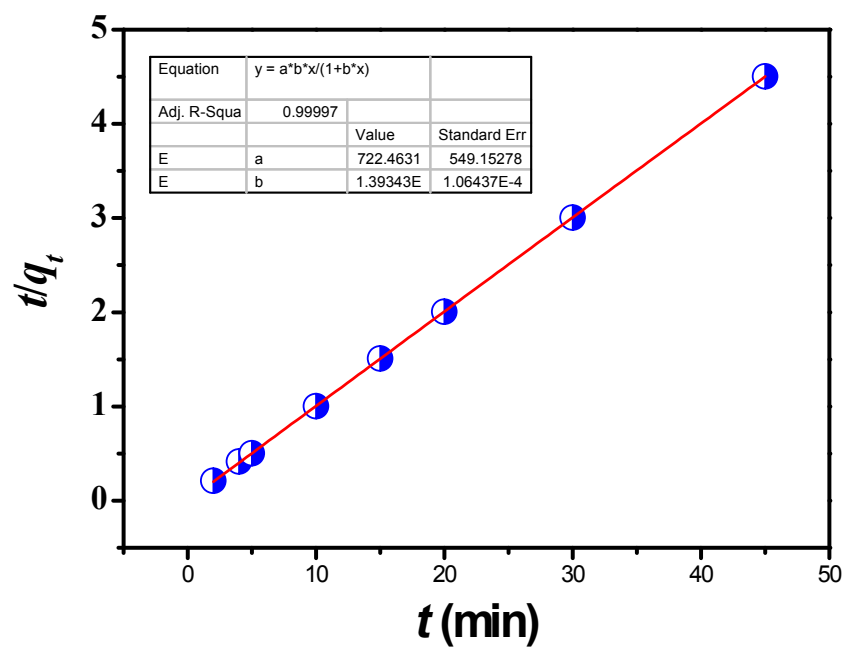

**Figure S7.** Pseudo-second-order model for  $\text{Sr}^{2+}$  uptake by SZ-7.

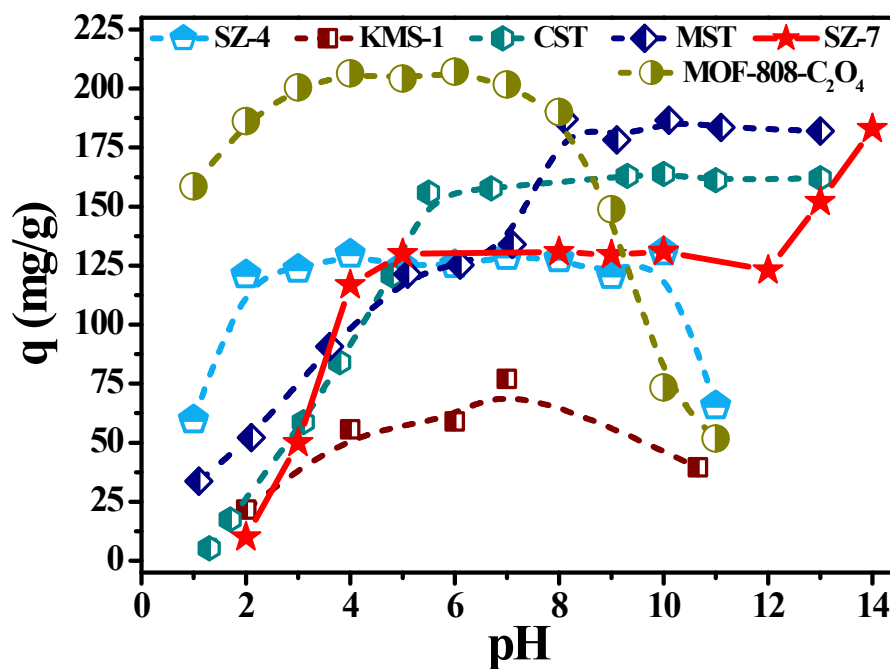

**Figure S8.** Comparison of the  $\text{Sr}^{2+}$  removal capacity ( $q$ ) by SZ-7 with other Sr-adsorbents at different pH values.

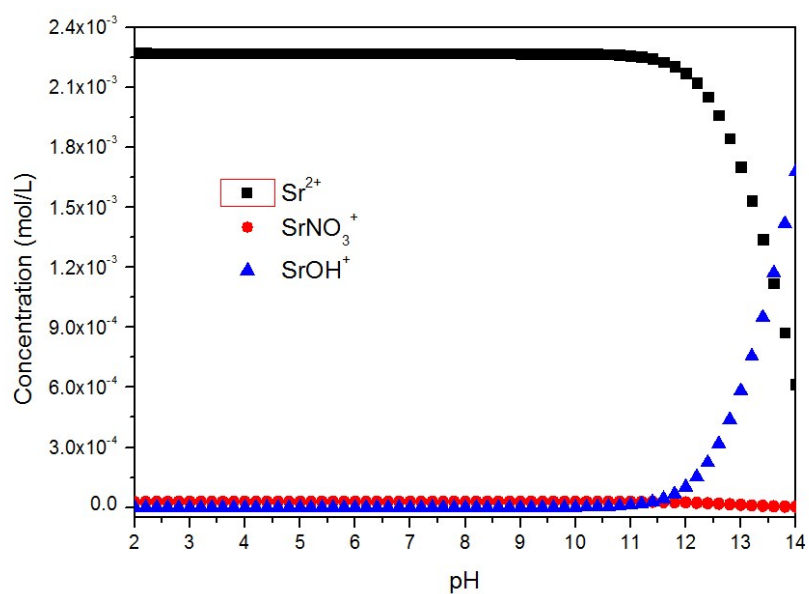

**Figure S9.** Thermodynamic calculations on the equilibrium speciation of  $\text{Sr}^{2+}$  at alkaline condition.

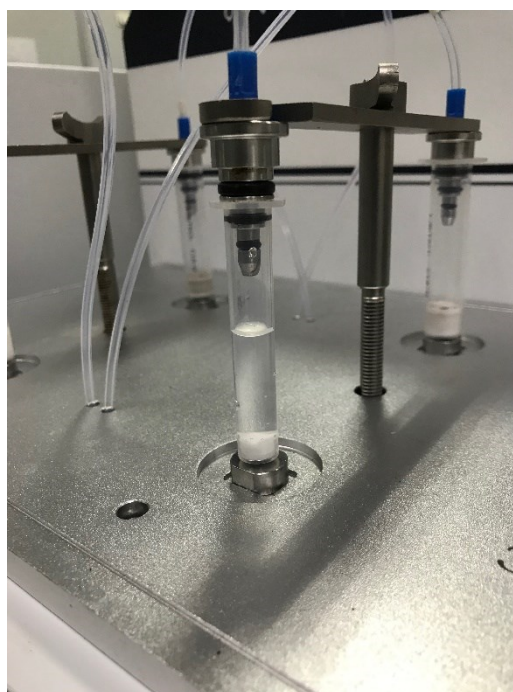

**Figure S10.** Ion-exchange column made with SZ-7 composite used in the column experiment.

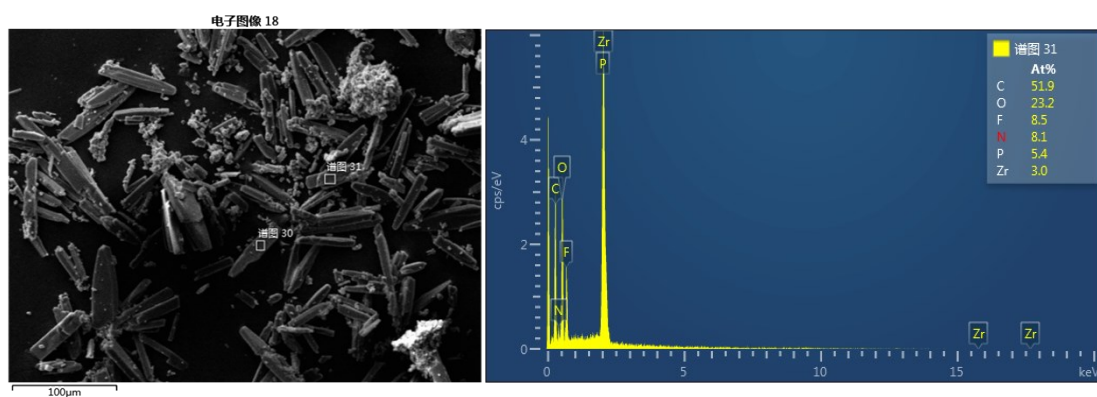

**Figure S11.** EDS data and SEM images of SZ-7.

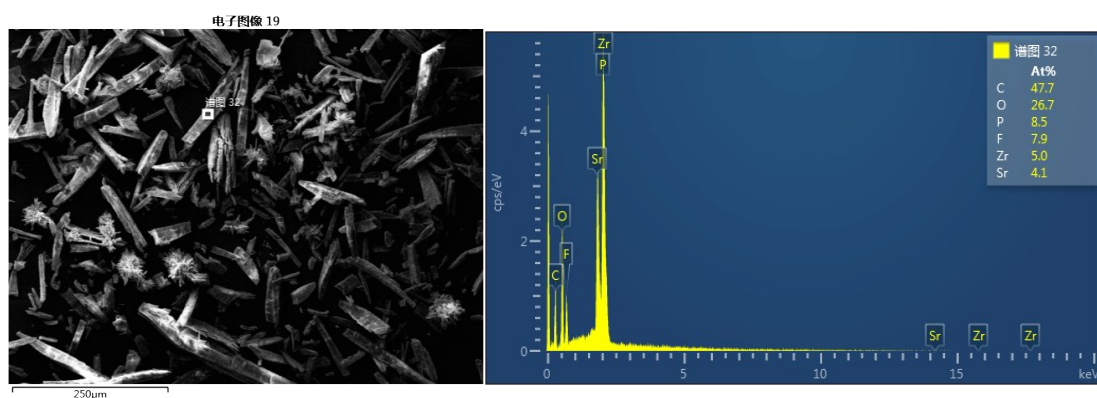

**Figure S12.** EDS data and SEM images of Sr-loaded SZ-7.

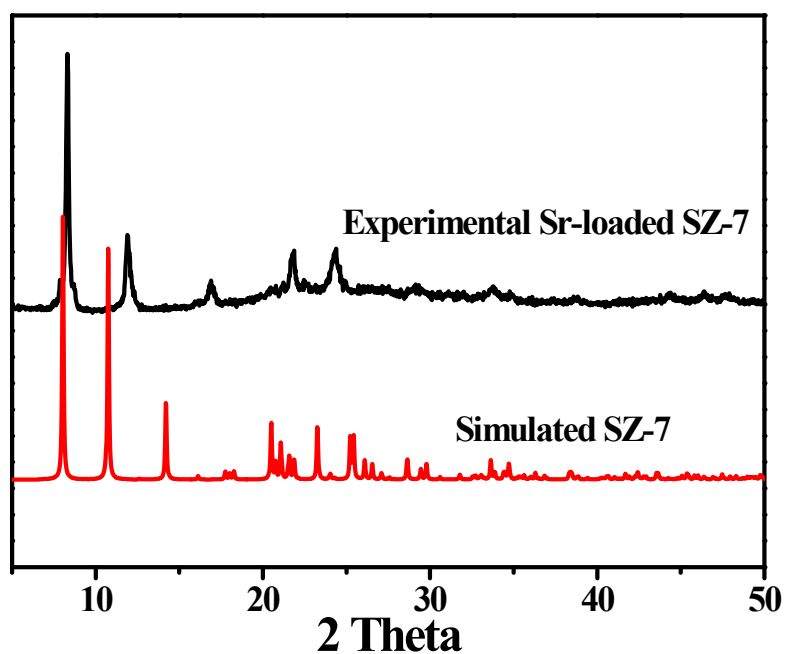

**Figure S13.** Powder X-ray diffraction patterns of experimental Sr-loaded SZ-7 samples.

## **Reference:**

- [1] N. E. Brese and M. O. Keeffe, *Acta Cryst.*, 1991, **B47**, 192-197.
- [2] X. -H. Qi, K. Du, Z. M. Feng, J. -R. Li, C. F. Du, B. Zhang and X. Huang, *J. Mater. Chem. A*, 2015, **3**, 5665-5673.
- [3] M. J. Manos, N. Ding and M. G. Kanatzidis, *Proc. Natl. Acad. Sci. U. S. A.*, 2008, **105**, 3696-3699.
- [4] J. L. Mertz, Z. H. Fard, C. D. Malliakas, M. J. Manos and M. G. Kanatzidis, *Chem. Mater.*, 2013, **25**, 2116-2127.
- [5] D. Sarma, C. D. Malliakas, K. S. Subrahmanyam, S. M. Islama and M. G. Kanatzidis, *Chem. Sci.*, 2016, **7**, 1121-1132.
- [6] C. C. Pavel and K. Popa, *Chem. Eng. J.*, 2014, **245**, 288-294.
- [7] J. Lehto and A. Clearfield, *Chem. Lett.*, 1987, **18**, 1-13.
- [8] A. M. El-Kamash, *J. Hazard. Mater.*, 2008, **151**, 432-445.
- [9] T. Wen, X. Wu, M. Liu, Z. Xing, X. Wang and A. W. Xu, *Dalton. Trans.*, 2014, **43**, 7464-7472
- [10] J. Zhang, L. Chen, X. Dai, L. Zhu, C. Xiao, L. Xu, Z. Zhang, E. V. Alekseev, Y. Wang, C. Zhang, H. Zhang, Y. Wang, J. Diwu, Z. Chai and S. Wang, *Chem*, 2019, **5**, 977-994.
- [11] Y.-J. Gao, M.-L. Feng, B. Zhang, Z.-F. Wu, Y. Song and X.-Y. Huang, *J. Mater. Chem. A*, 2018, **6**, 3967-3976.
- [12] P. Asgari, S. H. Mousavi, H. Aghayan, H. Ghasemi and T. Yousefi, *Microchem. J.*, 2019, **150**, 104188.

- [13] W. Mu, S. Du, X. Li, Q. Yu, R. Hu, H. Wei, Y. Yang and S. Peng, *Dalton. Trans.*, 2019, **48**, 3284-3290.
- [14] N. Shen, Z. Yang, S. Liu, X. Dai, C. Xiao, K. Taylor-Pashow, D. Li, C. Yang, J. Li, Y. Zhang, M. Zhang, R. Zhou, Z. Chai and S. Wang, *Nat. Commun.*, 2020, **11**, 5571.
